# Supplementary material for: Speeding up all-against-all protein comparisons while maintaining sensitivity by considering subsequence-level homology
Source: PeerJ. 2014 Oct 7;2:e607. doi: 10.7717/peerj.607 (PMC4193403; doi:10.7717/peerj.607)
Supplement: File S1 — List of species, including taxonomic ID and genome source and version. [file peerj-02-607-s002.xlsx]

## Sheet: Bacteria dataset
OMA 5letter code	Taxon ID	Species name	Source	Release
ACIC5	240015	Acidobacterium capsulatum (strain ATCC 51196 / DSM 11244 / JCM 7670)	Genome Reviews	16-JUN-2009 (Rel. 107, Last updated, Version 1)
CATAD	479433	Catenulispora acidiphila (strain DSM 44928 / NRRL B-24433 / NBRC 102108 / JCM 14897)	Genome Reviews	09-FEB-2010 (Rel. 117, Last updated, Version 5)
CHIPD	485918	Chitinophaga pinensis (strain ATCC 43595 / DSM 2588 / NCIB 11800 / UQM 2034)	Genome Reviews	09-FEB-2010 (Rel. 117, Last updated, Version 5)
CORAD	583355	Coraliomargarita akajimensis (strain DSM 45221 / IAM 15411 / JCM 23193 / KCTC 12865)	Genome Reviews	07-JUN-2011 (Rel. 130, Last updated, Version 7)
ECOLX	1040638	Escherichia coli	NCBI	AFOB02000109.1 GI:340738205
MYCMS	272632	Mycoplasma mycoides subsp. mycoides SC (strain PG1)	Genome Reviews	11-SEP-2007 (Rel. 80, Last updated, Version 74)
NAKMY	479431	Nakamurella multipartita (strain ATCC 700099 / DSM 44233 / JCM 9543 / Y-104)	Genome Reviews	10-AUG-2010 (Rel. 124, Last updated, Version 11)
ROTMD	680646	Rothia mucilaginosa (strain DY-18)	Genome Reviews	10-AUG-2010 (Rel. 124, Last updated, Version 5)
RHOSR	101510	Rhodococcus sp. (strain RHA1)	Genome Reviews	11-SEP-2007 (Rel. 80, Last updated, Version 20)
SALNS	423368	Salmonella newport (strain SL254)	Genome Reviews	25-NOV-2008 (Rel. 99, Last updated, Version 2)
SALTO	369723	Salinispora tropica (strain ATCC BAA-916 / DSM 44818 / CNB-440)	Genome Reviews	18-MAR-2008 (Rel. 88, Last updated, Version 1)
STRRD	479432	Streptosporangium roseum (strain ATCC 12428 / DSM 43021 / JCM 3005 / NI 9100)	Genome Reviews	25-MAY-2010 (Rel. 121, Last updated, Version 4)
THEM4	391009	Thermosipho melanesiensis (strain BI429 / DSM 12029)	Genome Reviews	05-FEB-2008 (Rel. 86, Last updated, Version 2)
THET1	525904	Thermobaculum terrenum (strain ATCC BAA-798 / YNP1)	Genome Reviews	15-JUN-2010 (Rel. 122, Last updated, Version 6)

## Sheet: Fungi dataset
	OMA 5letter code	Taxon ID	Species name	Source	Release
	ASPCL	344612	Aspergillus clavatus (strain ATCC 1007 / CBS 513.65 / DSM 816 / NCTC 3887 / NRRL 1)	EnsemblGenomes	Ensembl Fungi 16; CADRE; 19-OCT-2012
	ASPFU	330879	Neosartorya fumigata (strain ATCC MYA-4609 / Af293 / CBS 101355 / FGSC A1100)	EBI	27-JUL-2005 (Rel. 84, Last updated, Version 2)
	CANAW	294748	Candida albicans (strain WO-1)	EBI	12-JUN-2009 (Rel. 101, Last updated, Version 5)
	EMENI	227321	Emericella nidulans (strain FGSC A4 / ATCC 38163 / CBS 112.46 / NRRL 194 / M139)	EnsemblGenomes	Ensembl Fungi v4; Eurofung Sep 2006; 17-FEB-2010
	EURHE	41413	Eurotium herbariorum	JGI	JGI; Eurhe1; 12-MAR-2012
	NEUCR	367110	Neurospora crassa (strain ATCC 24698 / 74-OR23-1A / CBS 708.71 / DSM 1257 / FGSC 987)	EnsemblGenomes	Ensembl Fungi 4; EF 1; 17-FEB-2010
	PENCH	5076	Penicillium chrysogenum	JGI	JGI; Pench1; 07-MAR-2012
	PENCW	500485	Penicillium chrysogenum (strain ATCC 28089 / DSM 1075 / Wisconsin 54-1255)	NCBI	NS_000201.1 GI:256353024
	SCHPO	284812	Schizosaccharomyces pombe (strain 972 / ATCC 24843)	EnsemblGenomes	Ensembl Fungi 4; GeneDB EF 1; 17-FEB-2010
	SPAPN	619300	Spathaspora passalidarum (strain NRRL Y-27907 / 11-Y1)	JGI	JGI; Spapa3; 07-MAR-2012
	WALSE	148960	Wallemia sebi	JGI	JGI; Walse1; 07-MAR-2012
	YEAST	559292	Saccharomyces cerevisiae (strain ATCC 204508 / S288c)	Ensembl	Ensembl 73; EF4; 23-AUG-2013

## Sheet: Mixed dataset
OMA 5letter code	Taxon ID	Species name	Source	Release
ARATH	3702	Arabidopsis thaliana	EnsemblGenomes	Ensembl Plants 20; TAIR10; 2-SEP-2013
BACSU	224308	Bacillus subtilis (strain 168)	Genome Reviews	12-SEP-2005 (Rel. 35, Last updated, Version 40)
HUMAN	9606	Homo sapiens	Ensembl	Ensembl 73; GRCh37; 24-AUG-2013
PLAF7	36329	Plasmodium falciparum (isolate 3D7)	EnsemblGenomes	Ensembl Protists release 2; PlasmoDB_5.5; 22-JUL-2009
XENTR	8364	Xenopus tropicalis	Ensembl	Ensembl 73; JGI_4.2; 23-AUG-2013
YEAST	559292	Saccharomyces cerevisiae (strain ATCC 204508 / S288c)	Ensembl	Ensembl 73; EF4; 23-AUG-2013
