# Supplementary material for: Speeding up all-against-all protein comparisons while maintaining sensitivity by considering subsequence-level homology
Source: PeerJ. 2014 Oct 7;2:e607. doi: 10.7717/peerj.607 (PMC4193403; doi:10.7717/peerj.607)
Supplement: File S2 — Detailed comparisons with kClust and UCLUST. [file peerj-02-607-s003.xlsx]

## Sheet: Recall
Parameters used:
kClust: default (-s 1.12, -c 0.8)
	All-against-all total	All-against-all only	Both	kClust only		kClust
				Match length < 50	Match length >= 50
Bacteria
Run1	12742	11906 (93.44%)	836 (6.56%)	2	442	1280
Run2	61391	54739 (89.16%)	6652 (10.84%)	29	1068	7749
Run3	139766	129181 (92.43%)	10585 (7.57%)	40	2111	12736
Run4	318112	300606 (94.50%)	17506 (5.50%)	55	3714	21275
Run5	909863	867961 (95.39%)	41902 (4.61%)	92	6920	48914
Run6	1254733	1192481 (95.04%)	62252 (4.96%)	132	7571	69955
Fungi
Run1	58716	55460 (94.45%)	3256 (5.55%)	0	658	3914
Run2	222788	205557 (92.27%)	17231 (7.73%)	3	2025	19259
Run3	497128	456215 (91.77%)	40913 (8.23%)	4	2982	43899
Run4	920323	845476 (91.87%)	74847 (8.13%)	6	3642	78495
Run5	1479326	1362942 (92.13%)	116384 (7.87%)	22	4630	121036
Run6	2192589	2016956 (91.99%)	175633 (8.01%)	31	6189	181853
Parameters used:
kClust: -s 1.12, -c 0.5
	All-against-all total	All-against-all only	Both	kClust only		kClust
				Match length < 50	Match length >= 50
Bacteria
Run1	12742	11592 (90.97%)	1150 (9.03%)	5	619	1774
Run2	61391	53102 (86.50%)	8289 (13.50%)	79	1551	9919
Run3	139766	125669 (89.91%)	14097 (10.09%)	93	3085	17275
Run4	318112	293836 (92.37%)	24276 (7.63%)	115	5358	29749
Run5	909863	849658 (93.38%)	60205 (6.62%)	171	10158	70534
Run6	1254733	1165881 (92.92%)	88852 (7.08%)	225	11355	100432
Fungi
Run1	58716	53370 (90.90%)	5346 (9.10%)	0	1206	6552
Run2	222788	194525 (87.31%)	28263 (12.69%)	7	3446	31716
Run3	497128	429900 (86.48%)	67228 (13.52%)	13	5230	72471
Run4	920323	796782 (86.58%)	123541 (13.42%)	23	6836	130400
Run5	1479326	1286774 (86.98%)	192552 (13.02%)	44	8728	201324
Run6	2192589	1905006 (86.88%)	287583 (13.12%)	58	11779	299420
Parameters used:
UCLUST: -id 0.3
	All-against-all total	All-against-all only	Both	UCLUST only	UCLUST
Bacteria
Run1	12742	12273 (96.32%)	469 (3.68%)	288	757
Run2	61391	55965 (91.16%)	5426 (8.84%)	1137	6563
Run3	139766	132247 (94.62%)	7519 (5.38%)	1629	9148
Run4	318112	306601 (96.38%)	11511 (3.62%)	2820	14331
Run5	909863	881081 (96.84%)	28782 (3.16%)	5309	34091
Run6	1254733	1210070 (96.44%)	44663 (3.56%)	6060	50723
Fungi
Run1	58716	54753 (93.25%)	3963 (6.75%)	602	4565
Run2	222788	200651 (90.06%)	22137 (9.94%)	2309	24446
Run3	497128	445565 (89.63%)	51563 (10.37%)	3636	55199
Run4	920323	825234 (89.67%)	95089 (10.33%)	5013	100102
Run5	1479326	1334435 (90.21%)	144891 (9.79%)	6646	151537
Run6	2192589	1974178 (90.04%)	218411 (9.96%)	9796	228207
Parameters used:
UCLUST: -id 0.3, -target_cov 0.5, -maxaccepts 0, -maxrejects 0
	All-against-all total	All-against-all only	Both	UCLUST only	UCLUST
Bacteria
Run1	12742	12252 (96.15%)	490 (3.85%)	270	760
Run2	61391	56214 (91.57%)	5177 (8.43%)	807	5984
Run3	139766	132412 (94.74%)	7354 (5.26%)	1353	8707
Run4	318112	306332 (96.30%)	11780 (3.70%)	2610	14390
Run5	909863	880522 (96.78%)	29341 (3.22%)	5227	34568
Run6	1254733	1208408 (96.31%)	46325 (3.69%)	6066	52391
Fungi
Run1	58716	54844 (93.41%)	3872 (6.59%)	530	4402
Run2	222788	201089 (90.26%)	21699 (9.74%)	2082	23781
Run3	497128	447431 (90.00%)	49697 (10.00%)	3186	52883
Run4	920323	828514 (90.02%)	91809 (9.98%)	4199	96008
Run5	1479326	1337459 (90.41%)	141867 (9.59%)	5427	147294
Run6	2192589	1977766 (90.20%)	214823 (9.80%)	7663	222486

## Sheet: Runtime
Parameters used:
kClust 1: default (-s 1.12, -c 0.8)
kClust 2: -s 1.12, -c 0.5
UCLUST 1: -id 0.3
UCLUST 2: -id 0.3, -target_cov 0.5, -maxaccepts 0, -maxrejects 0
	kClust 1 (s)	kClust 2 (s)	UCLUST 1 (s)	UCLUST 2 (s)
Bacteria
Run1	26.2	26.53	3	12
Run2	73.49	83.52	6	25
Run3	124.79	133.87	11	68
Run4	177.76	174.58	17	116
Run5	343.36	310.16	39	186
Run6	527.43	424.1	47	223
Fungi
Run1	146.1	317.18	9	54
Run2	298.61	497.83	16	96
Run3	512.43	804.16	22	157
Run4	709.97	1138.86	28	190
Run5	870.15	1274.76	34	276
Run6	1075.51	1611.49	40	314
